# Supplementary material for: REMEMProt: a resource of membrane-enriched proteome profiles, their disease associations, and biomarker status
Source: PubMed Central journal article supplement (PMC11077588; doi:10.26508/lsa.202302443), 2024-05-07
Supplement: LSA-2023-02443_review_history.pdf [file LSA-2023-02443_review_history.pdf]

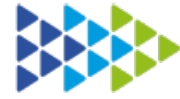

Life Science Alliance

# REMEMProt: Resource of membrane-enriched proteome, their disease associations, and biomarker status

Anjana Aravind, Revathy Nandakumar, Mukhtar Ahmed, Mahammad Nisar, Akhina Palollathil, Anagha Kanichery, Sourav Sreelan, K. P. Munavvar Sinan, Rex Devasahayam Arokia Balaya, Manavalan Vijayakumar, Thottethodi Subrahmanya Keshava Prasad and Rajesh Raju

DOI: <https://doi.org/10.26508/lsa.202302443>

Corresponding author(s): *Dr. Rajesh Raju (Yenepoya University)*

---

## Review Timeline:

|                     |            |
|---------------------|------------|
| Submission Date:    | 2023-10-19 |
| Editorial Decision: | 2024-01-16 |
| Revision Received:  | 2024-04-03 |
| Editorial Decision: | 2024-04-25 |
| Revision Received:  | 2024-04-26 |
| Accepted:           | 2024-04-26 |

---

*Scientific Editor: Eric Sawey, PhD*

## Transaction Report:

(Note: With the exception of the correction of typographical or spelling errors that could be a source of ambiguity, letters and reports are not edited. The original formatting of letters and referee reports may not be reflected in this compilation.)

No full Peer Review Process File is available with this article, as the authors have chosen not to make the review process public in this case.

January 16, 2024

Re: Life Science Alliance manuscript #LSA-2023-02443-T

Dr. Rajesh Raju  
Yenepoya University  
Centre for Integrative Omics Data Science (CIODS)  
Yenepoya University  
Deralakatte  
Mangalore, Karnataka 575018  
India

Dear Dr. Raju,

Thank you for submitting your manuscript entitled "REMEMPProt: Resource of membrane-enriched proteome, their disease associations, and biomarker status" to Life Science Alliance. The manuscript was assessed by expert reviewers, whose comments are appended to this letter. We invite you to submit a revised manuscript addressing the Reviewer comments.

To upload the revised version of your manuscript, please log in to your account: <https://lsa.msubmit.net/cgi-bin/main.plex>

You will be guided to complete the submission of your revised manuscript and to fill in all necessary information. Please get in touch in case you do not know or remember your login name.

While you are revising your manuscript, please also attend to the below editorial points to help expedite the publication of your manuscript. Please direct any editorial questions to the journal office.

The typical timeframe for revisions is three months. Please note that papers are generally considered through only one revision cycle, so strong support from the referees on the revised version is needed for acceptance.

When submitting the revision, please include a letter addressing the reviewers' comments point by point.

We hope that the comments below will prove constructive as your work progresses.

Thank you for this interesting contribution to Life Science Alliance. We are looking forward to receiving your revised manuscript.

Sincerely,

Eric Sawey, PhD  
Executive Editor  
Life Science Alliance  
<http://www.lsa-journal.org>

---

A. THESE ITEMS ARE REQUIRED FOR REVISIONS

-- A letter addressing the reviewers' comments point by point.

-- An editable version of the final text (.DOC or .DOCX) is needed for copyediting (no PDFs).

-- High-resolution figure, supplementary figure and video files uploaded as individual files: See our detailed guidelines for preparing your production-ready images, <https://www.life-science-alliance.org/authors>

-- Summary blurb (enter in submission system): A short text summarizing in a single sentence the study (max. 200 characters including spaces). This text is used in conjunction with the titles of papers, hence should be informative and complementary to the title and running title. It should describe the context and significance of the findings for a general readership; it should be written in the present tense and refer to the work in the third person. Author names should not be mentioned.

-- By submitting a revision, you attest that you are aware of our payment policies found here: <https://www.life-science-alliance.org/copyright-license-fee>

## B. MANUSCRIPT ORGANIZATION AND FORMATTING:

Full guidelines are available on our Instructions for Authors page, <https://www.life-science-alliance.org/authors>

We encourage our authors to provide original source data, particularly uncropped/-processed electrophoretic blots and spreadsheets for the main figures of the manuscript. If you would like to add source data, we would welcome one PDF/Excel-file per figure for this information. These files will be linked online as supplementary "Source Data" files.

**\*\*\*IMPORTANT:** It is Life Science Alliance policy that if requested, original data images must be made available. Failure to provide original images upon request will result in unavoidable delays in publication. Please ensure that you have access to all original microscopy and blot data images before submitting your revision.\*\*\*

-----

April 25, 2024

RE: Life Science Alliance Manuscript #LSA-2023-02443-TR

Dr. Rajesh Raju  
Yenepoya University  
Centre for Integrative Omics Data Science (CIODS)  
Yenepoya University  
Deralakatte  
Mangalore, Karnataka 575018  
India

Dear Dr. Raju,

Thank you for submitting your revised manuscript entitled "REMEMProt: Resource of membrane-enriched proteome, their disease associations, and biomarker status". We would be happy to publish your paper in Life Science Alliance pending final revisions necessary to meet our formatting guidelines.

Along with points mentioned below, please tend to the following:

- please be sure that the authorship listing and order is correct
- Please provide a clean manuscript file without tracked-changes/highlights in .docx file format
- Please incorporate any points from the Conclusion section into the Discussion, we only allow a Discussion section
- Please consult our manuscript preparation guidelines <https://www.life-science-alliance.org/manuscript-prep> and make sure your manuscript sections are in the correct order
- Please include all panels of Figure 4 into one Figure file
- Please remove the Graphical Abstract and figures from the main manuscript file. They should only be uploaded as separate files.
- Please move Table 1 at the end of main manuscript file
- Please move your main, supplementary figure, and table legends to the end of main manuscript file after the references section
- Please separate the Figure/Table legends and Supplemental Figure/Table legends into separate sections and rename: 'Figure legends' and 'Supplementary figure legends'
- Supporting Tables should be numbered consecutively with Arabic numerals (S1, S2, S3 etc.)
- Both A and B section of Figure 3 need to be included in the figure caption
- Please add a callout for Figures 3A-B and 4C to your main manuscript text
- Please use the [10 author names, et al.] format in your references (i.e. limit the author names to the first 10)
- The contributions listed for Manavalan Vijayakumar, Rex Devasahayam Arokia Balaya and Mukhtar Ahmed do not qualify for authorship. Please either update the contributions in our system and in the Author Contributions section of the manuscript, or let us know if any of the authors should be removed.

If you are planning a press release on your work, please inform us immediately to allow informing our production team and scheduling a release date.

LSA now encourages authors to provide a 30-60 second video where the study is briefly explained. We will use these videos on social media to promote the published paper and the presenting author (for examples, see <https://twitter.com/LSAJournal/timelines/1437405065917124608>). Corresponding or first-authors are welcome to submit the video. Please submit only one video per manuscript. The video can be emailed to [contact@life-science-alliance.org](mailto:contact@life-science-alliance.org)

To upload the final version of your manuscript, please log in to your account: <https://lsa.msubmit.net/cgi->

bin/main.plex

You will be guided to complete the submission of your revised manuscript and to fill in all necessary information. Please get in touch in case you do not know or remember your login name.

To avoid unnecessary delays in the acceptance and publication of your paper, please read the following information carefully.

#### A. FINAL FILES:

These items are required for acceptance.

-- An editable version of the final text (.DOC or .DOCX) is needed for copyediting (no PDFs).

-- High-resolution figure, supplementary figure and video files uploaded as individual files: See our detailed guidelines for preparing your production-ready images, <https://www.life-science-alliance.org/authors>

-- Summary blurb (enter in submission system): A short text summarizing in a single sentence the study (max. 200 characters including spaces). This text is used in conjunction with the titles of papers, hence should be informative and complementary to the title. It should describe the context and significance of the findings for a general readership; it should be written in the present tense and refer to the work in the third person. Author names should not be mentioned.

#### B. MANUSCRIPT ORGANIZATION AND FORMATTING:

Full guidelines are available on our Instructions for Authors page, <https://www.life-science-alliance.org/authors>

We encourage our authors to provide original source data, particularly uncropped/-processed electrophoretic blots and spreadsheets for the main figures of the manuscript. If you would like to add source data, we would welcome one PDF/Excel-file per figure for this information. These files will be linked online as supplementary "Source Data" files.

**\*\*Submission of a paper that does not conform to Life Science Alliance guidelines will delay the acceptance of your manuscript.\*\***

**\*\*It is Life Science Alliance policy that if requested, original data images must be made available to the editors. Failure to provide original images upon request will result in unavoidable delays in publication. Please ensure that you have access to all original data images prior to final submission.\*\***

**\*\*The license to publish form must be signed before your manuscript can be sent to production. A link to the electronic license to publish form will be available to the corresponding author only. Please take a moment to check your funder requirements.\*\***

**\*\*Reviews, decision letters, and point-by-point responses associated with peer-review at Life Science Alliance will be published online, alongside the manuscript. If you do want to opt out of having the reviewer reports and your point-by-point responses displayed, please let us know immediately.\*\***

Thank you for your attention to these final processing requirements. Please revise and format the manuscript and upload materials within 4 days.

Thank you for this interesting contribution, we look forward to publishing your paper in Life Science Alliance.

Sincerely,

Eric Sawey, PhD  
Executive Editor



April 26, 2024

RE: Life Science Alliance Manuscript #LSA-2023-02443-TRR

Dr. Rajesh Raju  
Yenepoya University  
Centre for Integrative Omics Data Science (CIODS)  
Yenepoya University  
Deralakatte  
Mangalore, Karnataka 575018  
India

Dear Dr. Raju,

Thank you for submitting your Resource entitled "REMEMProt: Resource of membrane-enriched proteome, their disease associations, and biomarker status". It is a pleasure to let you know that your manuscript is now accepted for publication in Life Science Alliance. Congratulations on this interesting work.

The final published version of your manuscript will be deposited by us to PubMed Central upon online publication.

Your manuscript will now progress through copyediting and proofing. It is journal policy that authors provide original data upon request.

Reviews, decision letters, and point-by-point responses associated with peer-review at Life Science Alliance will be published online, alongside the manuscript. If you do want to opt out of having the reviewer reports and your point-by-point responses displayed, please let us know immediately.

\*\*\*IMPORTANT: If you will be unreachable at any time, please provide us with the email address of an alternate author. Failure to respond to routine queries may lead to unavoidable delays in publication.\*\*\*

Scheduling details will be available from our production department. You will receive proofs shortly before the publication date. Only essential corrections can be made at the proof stage so if there are any minor final changes you wish to make to the manuscript, please let the journal office know now.

#### DISTRIBUTION OF MATERIALS:

Authors are required to distribute freely any materials used in experiments published in Life Science Alliance. Authors are encouraged to deposit materials used in their studies to the appropriate repositories for distribution to researchers.

You can contact the journal office with any questions, [contact@life-science-alliance.org](mailto:contact@life-science-alliance.org)

Again, congratulations on a very nice paper. I hope you found the review process to be constructive and are pleased with how the manuscript was handled editorially. We look forward to future exciting submissions from your lab.

Sincerely,

Eric Sawey, PhD  
Executive Editor

Life Science Alliance

<http://www.lsjournal.org><http://www.lsjournal.org>
